# Supplementary material for: Crystal chemistry and molar volume of potassic-chloro-hastingsite
Source: Copernicus journal article supplement (doi:10.5194/ejm-36-247-2024), 2024-03-01
Supplement: Supplementary file 1 [file ejm-36-247-2024-supplement.pdf]

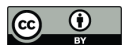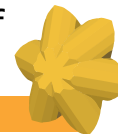

*Supplement of*

## **Crystal chemistry and molar volume of potassic-chloro-hastingsite**

**Jared P. Matteucci et al.**

*Correspondence to:* Jared P. Matteucci (jmatteu1@binghamton.edu)

The copyright of individual parts of the supplement might differ from the article licence.

**Table S1.** Regression statistics and coefficients obtained by multiple regression of the composition vs unit-cell parameters for the amphiboles synthesized in this study.

| Parameter               | <i>a</i> |  | <i>b</i> |  | <i>c</i> |  | $\beta$ |  |
|-------------------------|----------|--|----------|--|----------|--|---------|--|
| Multiple R              | 0.990    |  | 0.994    |  | 0.964    |  | 0.989   |  |
| R <sup>2</sup>          | 0.981    |  | 0.987    |  | 0.929    |  | 0.978   |  |
| Adjusted R <sup>2</sup> | 0.976    |  | 0.984    |  | 0.910    |  | 0.974   |  |
| Standard Error          | 0.0097   |  | 0.0088   |  | 0.0040   |  | 0.0556  |  |
| <i>n</i>                | 25       |  | 25       |  | 25       |  | 25      |  |

  

|                                  | $\psi_i^a$ (Å)  | P-value ( <i>a</i> )       | $\psi_i^b$ (Å)   | P-value ( <i>b</i> )       | $\psi_i^c$ (Å)  | P-value ( <i>c</i> )       | $\psi_i^\beta$ (°) | P-value ( $\beta$ )        |
|----------------------------------|-----------------|----------------------------|------------------|----------------------------|-----------------|----------------------------|--------------------|----------------------------|
| Intercept                        | 9.5539<br>(698) | 6.4 x<br>10 <sup>-30</sup> | 17.8516<br>(584) | 1.5 x<br>10 <sup>-36</sup> | 5.2817<br>(108) | 2.1 x<br>10 <sup>-40</sup> | 103.7621<br>(3751) | 2.6 x<br>10 <sup>-37</sup> |
| <sup>T</sup> Al                  | -0.0268<br>(90) | 7.5 x<br>10 <sup>-3</sup>  | -0.0651<br>(80)  | 1.4 x<br>10 <sup>-7</sup>  | 0.0206<br>(42)  | 9.4 x<br>10 <sup>-5</sup>  | -                  | -                          |
| <sup>C</sup> Fe <sub>Total</sub> | 0.0348<br>(52)  | 2.3 x<br>10 <sup>-6</sup>  | 0.0465<br>(51)   | 2.2 x<br>10 <sup>-8</sup>  | 0.0109<br>(21)  | 4.0 x<br>10 <sup>-5</sup>  | -0.0843<br>(299)   | 1.1 x<br>10 <sup>-2</sup>  |
| <sup>B</sup> Ca                  | 0.1275<br>(423) | 7.2 x<br>10 <sup>-3</sup>  | 0.1422<br>(364)  | 9.5 x<br>10 <sup>-4</sup>  | -               | -                          | 0.7375<br>(2413)   | 6.2 x<br>10 <sup>-3</sup>  |
| <sup>A</sup> Na                  | -               | -                          | 0.0273<br>(86)   | 5.2 x<br>10 <sup>-3</sup>  | 0.0250<br>(81)  | 5.8 x<br>10 <sup>-3</sup>  | -                  | -                          |
| <sup>A</sup> K                   | 0.1681<br>(100) | 7.3 x<br>10 <sup>-13</sup> | -                | -                          | -0.0285<br>(80) | 2.1 x<br>10 <sup>-3</sup>  | 0.7623<br>(563)    | 1.6 x<br>10 <sup>-11</sup> |
| Cl                               | -0.0299<br>(51) | 1.3 x<br>10 <sup>-5</sup>  | 0.0903<br>(45)   | 3.1 x<br>10 <sup>-14</sup> | 0.0240<br>(23)  | 3.6 x<br>10 <sup>-9</sup>  | -0.3790<br>(294)   | 3.7 x<br>10 <sup>-11</sup> |

**Table S2.** List of amphiboles used in the multivariate regression that are not from this study.

| Amphibole Species | Sample ID   | $a$ (Å) | $b$ (Å) | $c$ (Å) | $\beta$ (Å) | Study                      |
|-------------------|-------------|---------|---------|---------|-------------|----------------------------|
| MHst              | A3-11T      | 9.926   | 18.029  | 5.297   | 105.460     | Semet (1973)               |
|                   | A4-11C      | 9.928   | 18.015  | 5.282   | 105.430     |                            |
| FTs               | -           | 9.818   | 18.106  | 5.331   | 105.000     | Hawthorne & Grundy (1973a) |
| Krs               | -           | 9.892   | 18.064  | 5.312   | 105.388     | Hawthorne & Grundy (1973b) |
| Hst               | -           | 9.866   | 18.014  | 5.355   | 105.082     | Hawthorne & Grundy (1977)  |
| KcHst             | -           | 9.962   | 18.287  | 5.360   | 104.920     | Dick & Robinson (1979)     |
| Hbl               | -           | 9.832   | 18.037  | 5.302   | 105.010     | Hawthorne et al. (1980)    |
| KcHst             | -           | 9.957   | 18.294  | 5.377   | 104.900     | Suwa et al. (1987)         |
| KCFPrg            | AN-4        | 9.922   | 18.219  | 5.360   | 104.810     | Castelli (1988)            |
| KcFPrg            | AN-2        | 9.884   | 18.143  | 5.332   | 104.860     |                            |
| KcHst             | -           | 9.962   | 18.283  | 5.372   | 104.870     | Makino et al. (1993)       |
| KHst              | Cl0         | 9.895   | 18.119  | 5.332   | 105.170     | Oberti et al. (1993)       |
| cFPrg             | Cl1         | 9.884   | 18.143  | 5.332   | 104.860     |                            |
| KCHst             | Cl2         | 9.922   | 18.219  | 5.360   | 104.810     |                            |
| $\zeta$ Prg       | FP(1)       | 9.820   | 17.896  | 5.294   | 105.300     | Oberti et al. (1995)       |
|                   | FP(2)       | 9.808   | 17.868  | 5.297   | 105.300     |                            |
| Cnl               | -           | 9.826   | 17.906  | 5.301   | 105.410     | Hawthorne et al. (1996)    |
| Prg               | Parg 11-7   | 9.893   | 17.944  | 5.280   | 105.505     | Sharma & Jenkins (1999)    |
|                   | Parg 19-11  | 9.902   | 17.975  | 5.275   | 105.384     |                            |
|                   | Parg 19-12  | 9.888   | 17.976  | 5.276   | 105.320     |                            |
|                   | Parg 13-43  | 9.901   | 17.972  | 5.276   | 105.393     |                            |
|                   | Parg 13-44  | 9.896   | 17.972  | 5.278   | 105.389     |                            |
|                   | Parg 20-2   | 9.847   | 17.990  | 5.279   | 105.099     |                            |
| Tr                | Parg 17-4   | 9.828   | 18.024  | 5.279   | 104.867     | Sokolova et al. (2000)     |
|                   | Parg 18-3   | 9.816   | 18.040  | 5.278   | 104.741     |                            |
|                   | Trem 23-13  | 9.809   | 18.054  | 5.276   | 104.570     |                            |
| KfSdg             | -           | 9.931   | 18.095  | 5.368   | 105.190     | Sokolova et al. (2000)     |
| MSdg              | GSJM35151-1 | 9.869   | 17.933  | 5.322   | 105.290     | Banno et al. (2004)        |
|                   | GSJM35151-2 | 9.906   | 17.971  | 5.319   | 105.480     |                            |

**Table S2.** (continued)

| Amphibole Species | Sample ID    | <i>a</i> (Å) | <i>b</i> (Å) | <i>c</i> (Å) | $\beta$ (Å) | Study                     |
|-------------------|--------------|--------------|--------------|--------------|-------------|---------------------------|
| KMHst             | 77010721-3   | 10.007       | 18.107       | 5.368        | 105.660     | Shirashi et al. (1994)    |
|                   | 77010721-1   | 9.941        | 18.110       | 5.337        | 105.250     |                           |
|                   | 80D10-3      | 10.002       | 18.112       | 5.356        | 105.540     |                           |
| KfSdn             | FS           | 9.926        | 18.092       | 5.371        | 105.190     | Hawthorne & Harlow (2008) |
| KFPrg             | GSJ M38953   | 9.925        | 18.102       | 5.339        | 105.242     | Banno et al. (2009)       |
| Tr                | TREM 23-13   | 9.803        | 18.042       | 5.274        | 104.571     | Jenkins et al. (2013)     |
|                   | TREM 26-2    | 9.815        | 18.045       | 5.275        | 104.620     |                           |
|                   | WIN 7-1      | 9.816        | 18.039       | 5.276        | 104.585     |                           |
|                   | WIN 8-1      | 9.816        | 18.031       | 5.275        | 104.612     |                           |
|                   | Win9-1       | 9.808        | 18.000       | 5.280        | 104.575     |                           |
|                   | WIN 10-1     | 9.789        | 17.980       | 5.275        | 104.487     |                           |
|                   | Win4-2       | 9.774        | 17.964       | 5.266        | 104.423     |                           |
|                   | WIN 1-1      | 9.763        | 17.930       | 5.277        | 104.380     |                           |
| Gln               | WIN 11-1     | 9.747        | 17.920       | 5.277        | 104.268     |                           |
|                   | WIN 12-2     | 9.692        | 17.857       | 5.279        | 104.056     |                           |
|                   | WIN 2-2      | 9.657        | 17.800       | 5.285        | 103.942     |                           |
|                   | WIN 13-3     | 9.579        | 17.715       | 5.284        | 103.766     |                           |
| Prg               | -            | 9.882        | 17.973       | 5.282        | 105.200     | Heaveysege et al. (2015)  |
| ζMfHbl            | -            | 9.839        | 18.078       | 5.319        | 104.990     | Oberti et al. (2016a)     |
| FfHbl             | 1258         | 9.941        | 18.222       | 5.332        | 104.946     | Oberti et al. (2016b)     |
| Prg               | Hast-5-0-2c  | 9.844        | 17.993       | 5.286        | 105.083     | Mueller et al. (2017)     |
| MHbl              | Hast-5-20    | 9.819        | 18.032       | 5.297        | 104.878     |                           |
| Prg               | Hast-5-40-2b | 9.823        | 18.087       | 5.313        | 104.699     |                           |
|                   | Hast-5-50    | 9.794        | 18.059       | 5.319        | 104.628     |                           |
| FfHbl             | Hast-5-60-2  | 9.840        | 18.152       | 5.328        | 104.651     |                           |
| FHbl              | Hast-5-80    | 9.841        | 18.182       | 5.337        | 104.511     |                           |
| FfHbl             | Hast-5-100-2 | 9.864        | 18.200       | 5.336        | 104.756     |                           |
| Hst               | Hast-3-7     | 9.973        | 18.177       | 5.324        | 105.261     |                           |
| Prg               | Hast-6-1     | 9.865        | 17.999       | 5.288        | 105.172     |                           |
| Rct               | Am4          | 9.845        | 17.940       | 5.294        | 105.221     | Day et al. (2018)         |
| Prg               | Am5          | 9.885        | 17.978       | 5.283        | 105.193     |                           |
| MHbl              | -            | 9.831        | 18.066       | 5.297        | 104.771     | Oberti et al. (2018a)     |

Note: Prefixes: C = chloro (Cl > OH,F), c = Cl-rich (OH,F > Cl > 0.5 apfu), F = ferro, f = ferri, ζ = fluoro, M = magnesio, K = potassic.

## References.

- Banno, Y., Miyawaki, R., Matsubara, S., Makina, K., Bunno, M., Yamada, S., and Kamiya, T.: Magnesiosadanagaite, a new member of the amphibole group from Kasuga-mura, Gifu Prefecture, central Japan, *Eur. J. Mineral.*, **16**, 177-183, 2004.
- Banno, Y., Miyawaki, R., Matsubara, S., Sato, E., Nakai, I., Matsuo, G., and Yamada, S.: Potassic-ferropargasite, a new member of the amphibole group, from Kabutoichiba, Mie Prefecture, central Japan, *J. Mineral. Petrol. Sci.*, **104**, 374-382, 2009.
- Castelli, D.: Chlorpotassium ferro-pargasite from Sesia-Lanzo marbles (Western Italian Alps): a record of highly saline fluids, *Soc. Italiana Mineral. Petrol.*, **43**, 129-138, 1988.
- Day, M.C., Hawthorne, F.C., Susta, U., Della Ventura, G., and Harlow, G.E.: Short-range order-disorder in gem richterite and pargasite from Afghanistan: crystal-structure refinement and infrared spectroscopy, *Can. Mineral.*, **56**, 939-950, 2018.
- Dick, L.A. and Robinson, G.W.: Chlorine-bearing potassian hastingsite from a sphalerite skarn in southern Yukon, *Can. Mineral.*, **17**, 25-26, 1979.
- Hawthorne, F.C. and Grundy, H.D.: The crystal chemistry of the amphiboles. I: refinement of the crystal structure of ferrotschermakite, *Mineral. Mag.*, **39**, 36-48, 1973a.
- Hawthorne, F.C. and Grundy, H.D.: The crystal chemistry of the amphiboles. II: refinement of the crystal structure of oxy-kaersutite, *Mineral. Mag.*, **39**, 390-400, 1973b.
- Hawthorne, F.C. and Grundy, H.D.: The crystal chemistry of the amphiboles. III: refinement of the crystal structure of a sub-silicic hastingsite, *Mineral. Mag.*, **41**, 43-50, 1977.
- Hawthorne, F.C., Griep, J.L., and Curtis, L.: A three-amphibole assemblage from the Tallan Lake Sill, Peterborough County, Ontario, *Can. Mineral.*, **18**, 275-284, 1980.
- Hawthorne, F.C. and Harlow, G.E.: The crystal chemistry of Al-rich amphiboles: sadanagaite and potassic-ferrisadanagaite, *Can. Mineral.*, **46**, 151-162, 2008.
- Hawthorne, F.C., Oberti, R., Ungaretti, L., and Grice, J.D.: A new hyper-calcic amphibole with Ca at the A site: Fluor-cannilloite from Pargas, Finland, *Am. Mineral.*, **81**, 995-1002, 1996.
- Heaveysege, D., Abdu, Y.A., and Hawthorne, F.C. (2015): Long-range and short-range order in gem pargasite from Myanmar: crystal-structure refinement and infrared spectroscopy, *Can. Mineral.*, **56**, 497-510, 2015.
- Jenkins, D.M., Della Ventura, G., Oberti, R., and Bozhilov, K.: Synthesis and characterization of amphiboles along the tremolite-glaucophane join, *Am. Mineral.*, **98**, 588-600, 2013.

- Kaneva, E., Radomskaya, T., Shendrik, R., Chubarov, V., and Danilovsky, V.: Potassic-hastingsite from the Kedrovoy District (East Siberia, Russia): petrographic description, crystal chemistry, spectroscopy, and thermal behavior, *Minerals*, **11**(10), 1049, 2021.
- Makino, K., Tomita, K., and Suwa, K.: Effect of chlorine on the crystal structure of a chlorine-rich hastingsite, *Mineral. Mag.*, **57**, 677-685, 1993.
- Mueller, B.L., Jenkins, D.M., and Dyar, D.M.: Chlorine acceptance in amphiboles synthesized along the magnesio-hastingsite--hastingsite compositional join, *Eur. J. Mineral.*, **29**, 167-180, 2017.
- Oberti, R., Ungaretti, L., Cannillo, E., and Hawthorne, F.C.: The mechanism of Cl incorporation in amphibole, *Am. Mineral.*, **78**, 746-752, 1993.
- Oberti, R., Sardone, N., Hawthorne, F.C., Raudsepp, M., and Turnock, A.C.: Synthesis and crystal-structure of synthetic fluor-pargasite, *Can. Mineral.*, **33**, 25-31, 1995.
- Oberti, R., Boiocchi, M., Hawthorne, F.C., Ball, N.A., and Chiappino, L.: Magnesio-ferri-fluoro-hornblende from Portoscuso, Sardinia, Italy: description of a newly approved member of the amphibole supergroup, *Mineral. Mag.*, **80**(2), 269-275, 2016a.
- Oberti, R., Boiocchi, M., Hawthorne, F.C., Ball, N.A., Cámara, F., Pagano, R., and Pagano, A.: Ferro-ferri-hornblende from the Traversella mine (Ivrea, Italy): occurrence, mineral description, and crystal-chemistry, *Mineral. Mag.*, **80**(7), 1233-1242, 2016b.
- Oberti, R., Boiocchi, M., Hawthorne, F.C., and Ciriotti, M.E.: Magnesio-hornblende from Lüderitz, Namibia: mineral description and crystal chemistry, *Mineral. Mag.*, **82**(6), 1253-1259, 2018a.
- Ohashi, Y., and Finger, L.W.: Refinement of the crystal structure of sanidine at 25 and 400C. *Carnegie Inst. Wash. Yearbook*, **73**, 539-544, 1974.
- Semet, M.P.: A crystal-chemical study of synthetic magnesiohastingsite, *Am. Mineral.*, **58**, 480-494, 1973.
- Sharma, A., and Jenkins, D.M.: Hydrothermal synthesis of amphiboles along the tremolite-

pargasite join and in the ternary system tremolite-pargasite-cummingtonite, *Am. Mineral.*, **84**, 1304-1318, 1999.

Shirashi, K., Oba, T., Suzuki, M., and Ishikawa, K.: Subsilicic magnesian potassium-hastingsite from the Prince Olav Coast, East Antarctica, *Mineral. Mag.*, **58**, 621-627, 1994.

Sokolova, E.V., Hawthorne, F.C., Kabalov, Y.K., Schneider, J., and McCammon, C.: The crystal chemistry of Potassic-ferrisadanagaite, *Can. Mineral.*, **38**, 669-674, 2000.

Suwa, K., Enami, M., and Horiuchi, T.: Chlorine-rich potassium hastingsite from West Ongul Island, Lützow-Holm Bay, East Antarctica, *Mineral. Mag.*, **51**, 709-704, 1987.
